# Supplementary material
Source: publisher figshare collection journal article supplement (https://frontiersin.figshare.com/ndownloader/files/25321334)
Supplement: Supplementary file [file 25321334]

**Outpatient form**

**Survey: Covid-19 impact on patients and their interaction with Oslo University Hospital at Department of Old Age Psychiatry**  
**Anonymous survey.**

|                                |                                                          |
|--------------------------------|----------------------------------------------------------|
| Identification code (not name) | Education (number of years)                              |
| Age                            | Diagnosis group<br>(psychosis/dementia/depression/other) |
| Gender                         | Diagnosis / symptoms (free text)                         |

**1. I am afraid of getting contaminated by Covid-19**

agree 0 1 2 3 4 5 6 7 8 9 10 disagree

If 0-1 / 9-10:

Comment: \_\_\_\_\_

**2. I am afraid of dying if I get contaminated by Covid-19**

agree 0 1 2 3 4 5 6 7 8 9 10 disagree

If 0-1 / 9-10:

Comment: \_\_\_\_\_

**3. I believe that the outpatient clinic is less available because if the Covid-19 pandemic**

agree 0 1 2 3 4 5 6 7 8 9 10 disagree

If 0-1 / 9-10:

Comment: \_\_\_\_\_

**4. I think that the risk of getting contaminated is greater meeting at the outpatient clinic than staying at home**

agree 0 1 2 3 4 5 6 7 8 9 10 disagree

If 0-1 / 9-10:

Comment: \_\_\_\_\_

**5. I believe that my fear of getting Covid-19 makes me sicker**

agree 0 1 2 3 4 5 6 7 8 9 10 disagree

If 0-1 / 9-10:

Comment: \_\_\_\_\_

**6. I think my treatment at the outpatient clinic has been poorer because of Covid-19**

agree 0 1 2 3 4 5 6 7 8 9 10 disagree

If 0-1 / 9-10:

Comment: \_\_\_\_\_

**7. I believe the measures undertaken at the outpatient clinic to prevent Covid-19 have been correct**

agree 0 1 2 3 4 5 6 7 8 9 10 disagree

If 0-1 / 9-10:

Comment: \_\_\_\_\_

**8. I believe the Covid-19 situation has had an impact on my health**

agree 0 1 2 3 4 5 6 7 8 9 10 disagree

If 0-1 / 9-10:

Comment: \_\_\_\_\_

**9. I have concerns about meeting at the outpatient clinic because of the Covid-19 situation**

agree 0 1 2 3 4 5 6 7 8 9 10 disagree

If 0-1 / 9-10:

Comment: \_\_\_\_\_

**10. I have recieved information about the Covid-19 situation at the clinic**

agree 0 1 2 3 4 5 6 7 8 9 10 disagree

If 0-1 / 9-10:

Comment: \_\_\_\_\_

**11. I think the Department of Old Age Psychiatry guidelines to prevent contamination are difficult to relate to**

agree 0 1 2 3 4 5 6 7 8 9 10 disagree

If 0-1 / 9-10:

Comment: \_\_\_\_\_

**12. I have taken my own further precautions to reduce chances of contamination**

Yes / No

If yes: Which? \_\_\_\_\_

**13. I think the Covid-19 situation has had a negative impact on my recovery**

Yes / No

If yes:

- ☐ Worsening of ailments
- ☐ Prolonged period of illness
- ☐ New symptoms
- ☐ Other

Yes / No

Yes / No

Yes / No

Yes / No

**14. Other comments:**

\_\_\_\_\_

**Thank you for contributing 😊**
